# Supplementary material for: The aldehyde dehydrogenase 2 rs671 variant enhances amyloid β pathology
Source: PubMed Central journal article supplement (PMC10959958; doi:10.1038/s41467-024-46899-0), 2024-03-22
Supplement: 41467_2024_46899_MOESM3_ESM.pdf [file 41467_2024_46899_MOESM3_ESM.pdf]

## **Description of Additional Supplementary Files:**

**Supplementary Data 1:** Human brain samples used in the experiments in this study.

**Supplementary Data 2:** Proteomics data of N2a-APPswe cells with treatment of daidzin or Alda-1.

**Supplementary Data 3:** Proteomics data of BV2 cells with treatment of Alda-1.
